# Supplementary material for: Sediment transport modelling in riverine environments: on the importance of grain-size distribution, sediment density and boundary conditions
Source: Copernicus journal article supplement (doi:10.5194/hess-2018-511), 2018-11-06
Supplement: Supplementary file [file hess-2018-511-AC1-supplement.pdf]

***We would like first to thank Ulrich Zanke for the relevant remarks and comments:***

The paper was elaborated based by the use of SISYPHE. Within this code, the determination of settling velocities obviously is cited after v. Rijn (Hand book of Sediment Transport by currents and waves. Delft Hydraulics, Rep. H461, 1989).

Best wishes Ulrich Zanke

This formula, Eq. 6 in the paper under discussion has a spelling error. The number '18' in the denominator of the middle equation must be deleted. The area-wise subdivision is unnecessary (saves at most minimal computation time).

***We would like to thank Mr. Zanke for pointing out the error in equation 6 of our manuscript The necessary changes will be made in the final version of the manuscript.***

Apart from that, Eqn. 6 with v. Rijn cited as its author, is not correctly cited. Correct citation is Zanke, U. (1977): Berechnung der Sinkgeschwindigkeiten von Sedimenten (Determination of settling velocities of sediments). Mitteilungen Franzius Institute Univ. Hannover, Vol. 46, ISSN 0340 0077, full text for example at Researchgate). However, this citing error is not at the expense of the authors. Leo v. Rijn, quoted this formula accidentally incorrectly. In others of his publications he has quoted this formula correctly.

***We thank him for pointing out that equation 6 was not correctly quoted and we will correct this in the revised version of our manuscript.***

The middle equation also includes the solution "otherwise" and the solution for " $d \leq 10^{-4}$ ". It should also be noted that the grain size data such as " $d \leq 10^{-4}$ " only concern sands. However, the equation applies to any sediment densities in which the grain size assignments of Eqn. 6 then would not apply.

***In the SISYPHE module, the subroutine that computes fall rates is called only once per simulation (not at each time step). Consequently, this sub-division does not increase the computation time substantially.***
